# Supplementary material for: The value of fractional exhaled nitric oxide in occupational diseases – a systematic review
Source: Springer Nature journal article supplement (doi:10.1186/s12995-022-00355-1), 2022-07-25
Supplement: MOESM6 [file 12995_2022_355_MOESM6_ESM.pdf]

| Refid | Author(s)                                                                                                                                | Title                                                                                                                                                          |
|-------|------------------------------------------------------------------------------------------------------------------------------------------|----------------------------------------------------------------------------------------------------------------------------------------------------------------|
| 44    | Ojanguren I, Cruz MJ, Villar A, Barrecheguren M, Morell F, Muñoz X                                                                       | Utility of Exhaled Nitric Oxide Fraction for the Diagnosis of Hypersensitivity Pneumonitis                                                                     |
| 45    | Guerrero Zúñiga S, Sánchez Hernández J, Mateos Toledo H, Mejía Ávila M, Gochicoa-Rangel L, Miguel Reyes JL, Selman M, Torre-Bouscoulet L | Small airway dysfunction in chronic hypersensitivity pneumonitis                                                                                               |
| 46    | Lee JS, Shin JH, Lee JO, Lee KM, Kim JH, Choi BS                                                                                         | Levels of Exhaled Breath Condensate pH and Fractional Exhaled Nitric Oxide in Retired Coal Miners                                                              |
| 47    | Vlaanderen J, Pronk A, Rothman N, Hildesheim A, Silverman D, Hosgood DH, Spaan S, Kuijpers E, Godderis L, Hoet P, Lan Q, Vermeulen R     | A cross-sectional study of changes in markers of immunological effects and lung health due to exposure to multi-walled carbon nanotubes                        |
| 48    | Sandrini A, Johnson AR, Thomas PS, Yates DH                                                                                              | Fractional exhaled nitric oxide concentration is increased in asbestosis and pleural plaques.                                                                  |
| 49    | Radauceanu A, Grzebyk M, Edmé JL, Chérot-Kornobis N, Rousset D, Dziurla M, De Broucker V, Hédelin G, Sobaszek A, Hulo S                  | Effects of occupational exposure to poorly soluble forms of beryllium on biomarkers of pulmonary response in exhaled breath of workers in machining industries |

| <b>Year of Publication</b> | <b>journal</b> | <b>Selection Bias</b> | <b>Design type of study</b> | <b>Confounders</b> |
|----------------------------|----------------|-----------------------|-----------------------------|--------------------|
| 2016                       | Lung           | Moderate              | Cross sectional             | Strong             |
| 2017                       | Respirology    | Moderate              | Cross sectional             | Strong             |
| 2010                       | Toxicol Res    | Weak                  | Case control                | Moderate           |
| 2017                       | Nanotoxicology | Moderate              | Cross sectional             | Strong             |
| 2006                       | Respirology    | Moderate              | Case control                | Strong             |
| 2016                       | Toxicol Lett   | Weak                  | Cross sectional             | Moderate           |

| <b>Blinding</b> | <b>Data collection</b> | <b>Drop out rate</b> | <b>Global rate</b> |
|-----------------|------------------------|----------------------|--------------------|
| Moderate        | Strong                 | NA                   | Strong             |
| Moderate        | Strong                 | NA                   | Moderate           |
| Moderate        | Strong                 | NA                   | Moderate           |
| Strong          | Strong                 | NA                   | Strong             |
| Moderate        | Strong                 | NA                   | Strong             |
| Moderate        | Strong                 | NA                   | Moderate           |
